# Supplementary material
Source: PubMed Central journal article supplement (PMC8487971)

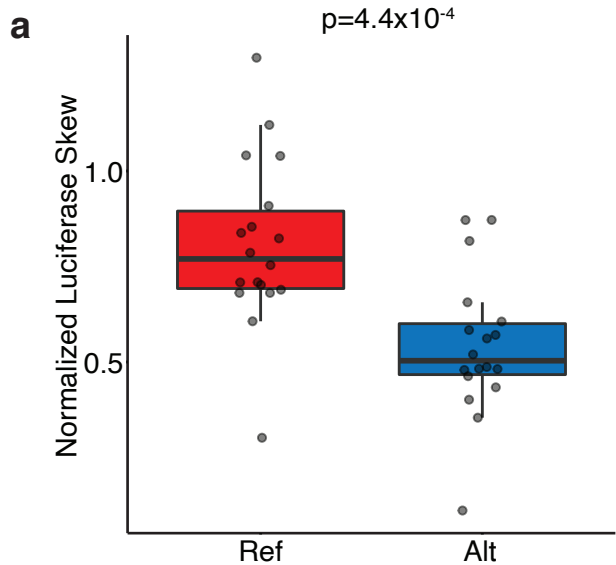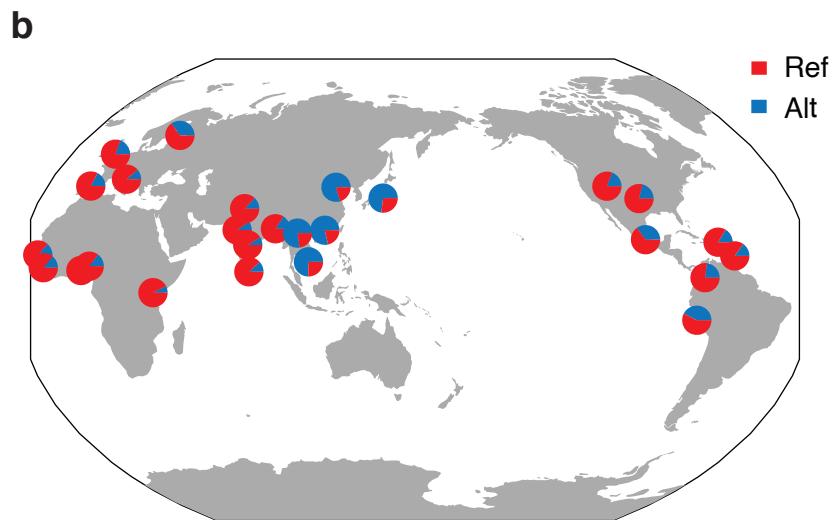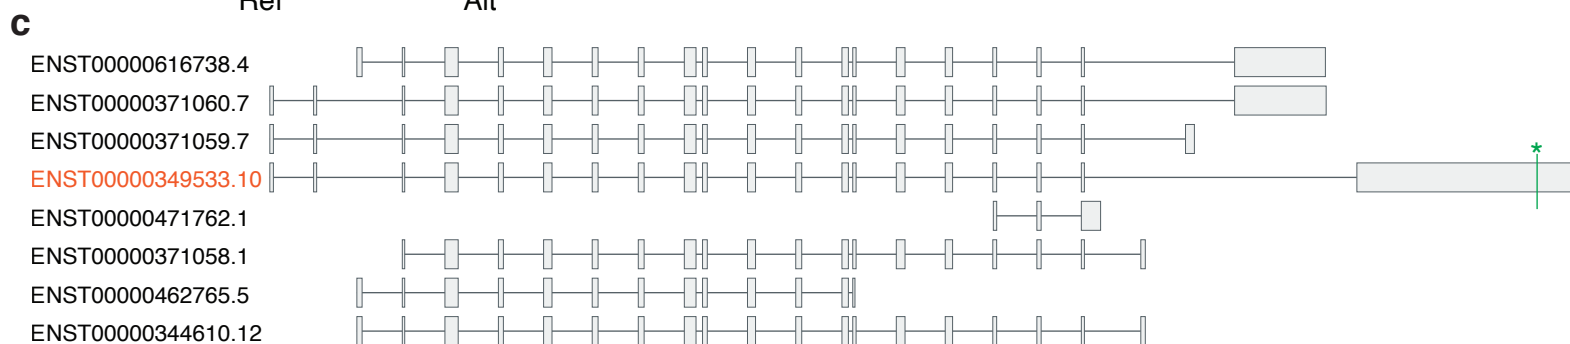

**d**

|                          | rs11771799<br>(T to C) | rs35986051<br>(T to C) | rs11761306<br>(A to G) |
|--------------------------|------------------------|------------------------|------------------------|
| Human                    | T                      | A                      | G                      |
| Chimp                    | T                      | A                      | C                      |
| Bonobo                   | T                      | A                      | C                      |
| Gorilla                  | T                      | A                      | C                      |
| Orangutan                | T                      | A                      | C                      |
| Gibbon                   | T                      | A                      | C                      |
| Rhesus                   | T                      | A                      | C                      |
| Crab-eating macaque      | T                      | A                      | C                      |
| Pig-tailed macaque       | T                      | A                      | C                      |
| Sooty mangabey           | T                      | A                      | C                      |
| Baboon                   | T                      | A                      | C                      |
| Green monkey             | T                      | A                      | C                      |
| Drill                    | T                      | A                      | C                      |
| Angolan colobus          | T                      | A                      | C                      |
| Golden snub-nosed monkey | T                      | A                      | C                      |
| Black snub-nosed monkey  | T                      | A                      | C                      |
| Marmoset                 | T                      | A                      | C                      |
| Squirrel monkey          | T                      | A                      | C                      |
| White-faced sapsajou     | T                      | A                      | C                      |
| Ma's night monkey        | T                      | A                      | C                      |
| Tarsier                  | T                      | A                      | C                      |
| Mouse lemur              | T                      | A                      | C                      |
| Coquerel's sifaka        | T                      | A                      | C                      |
| Black lemur              | T                      | A                      | C                      |
| Slclater's lemur         | T                      | A                      | C                      |
| Bushbaby                 | T                      | A                      | C                      |
| Dog                      | T                      | A                      | C                      |
| Armadillo                | T                      | A                      | C                      |
| Proboscis monkey         | =                      | =                      | =                      |

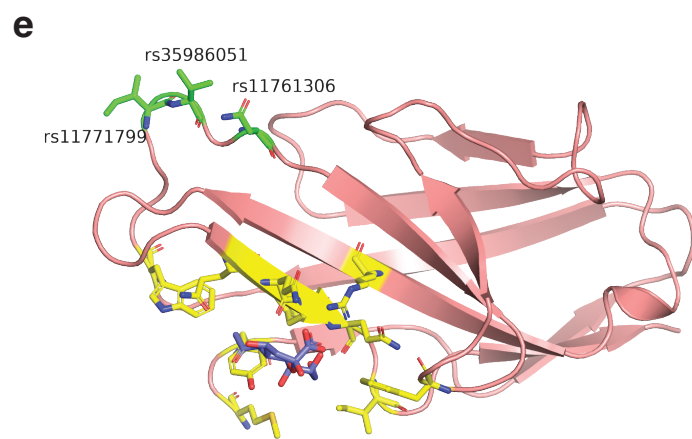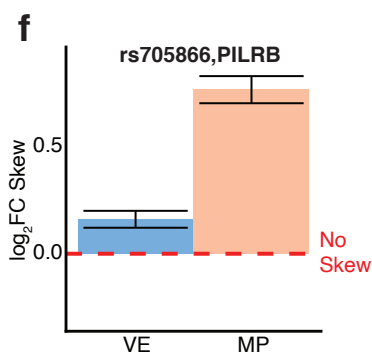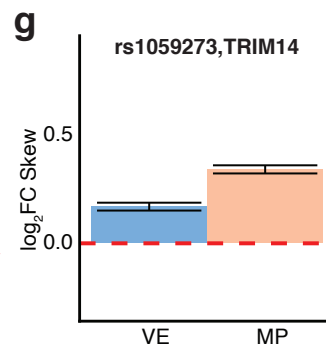

Supplement: NIHMS1739899-supplement-6.pdf [file NIHMS1739899-supplement-6.pdf]
