# Supplementary material
Source: PubMed Central journal article supplement (PMC8487971)

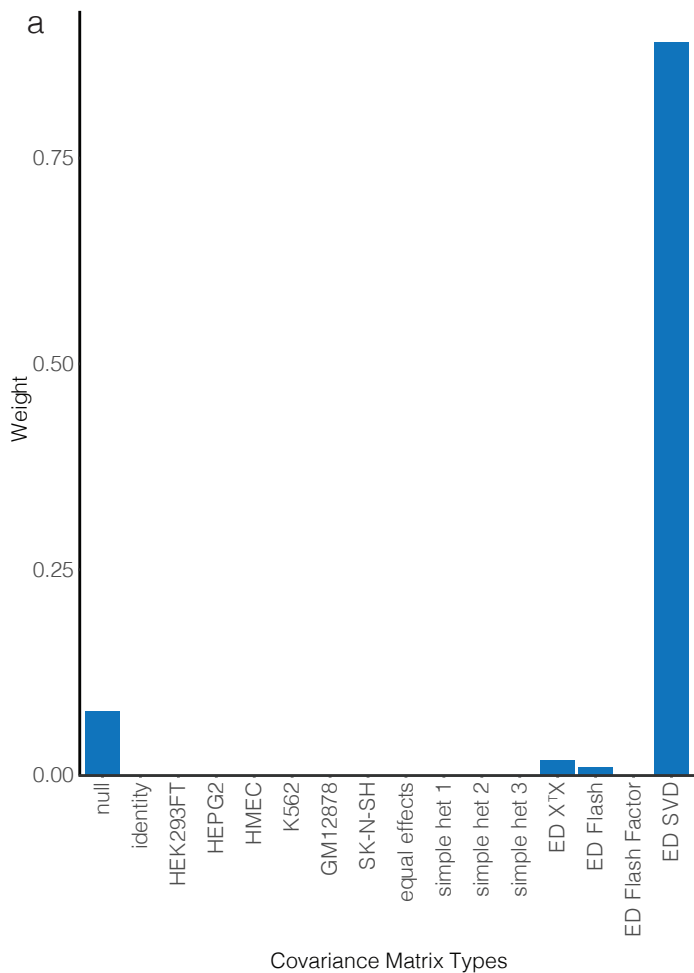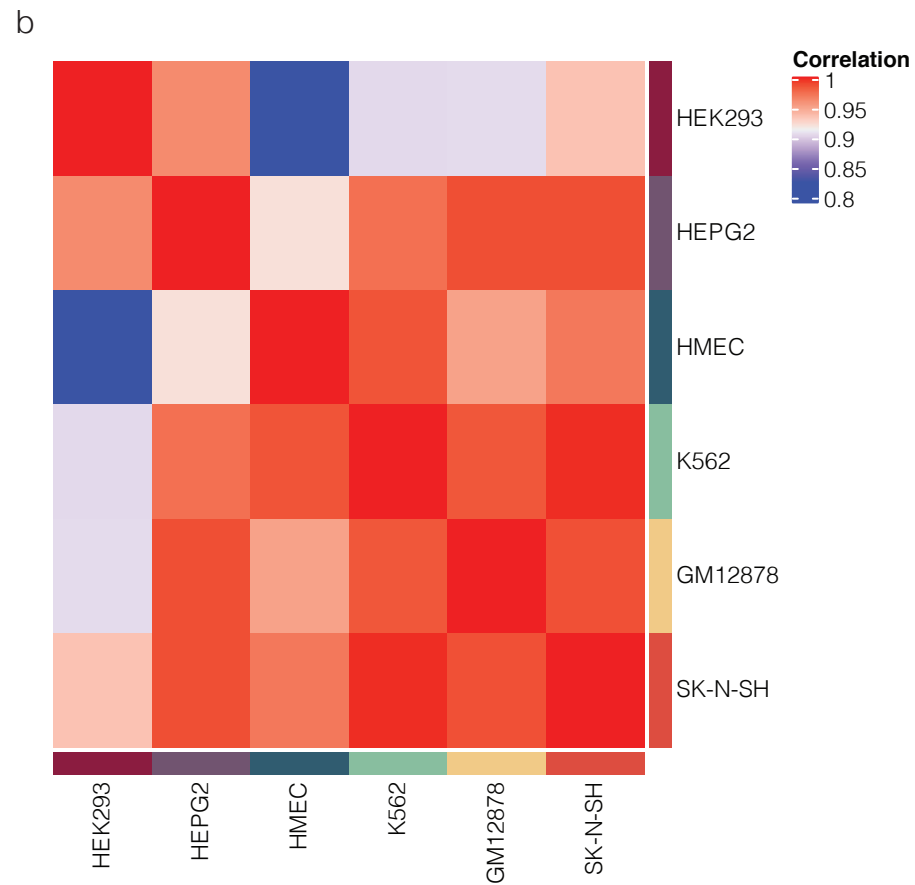

Supplement: NIHMS1739899-supplement-2.pdf [file NIHMS1739899-supplement-2.pdf]

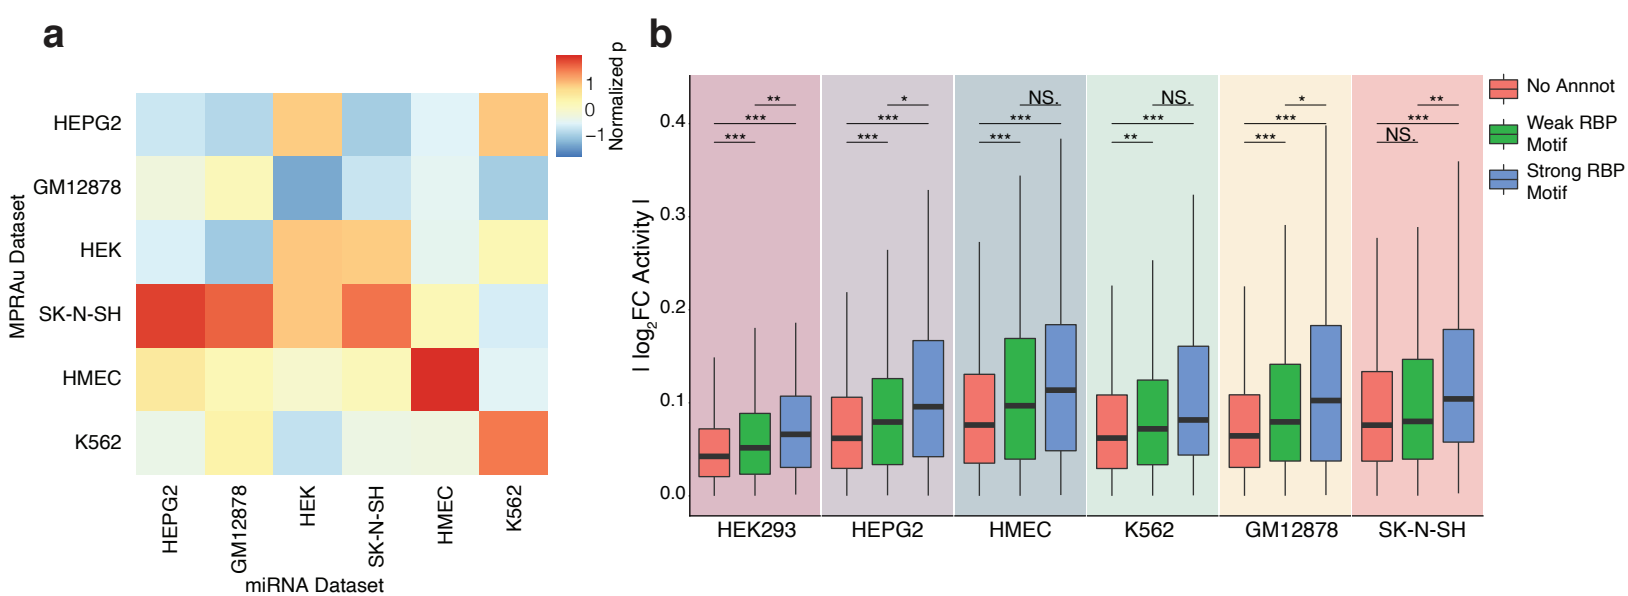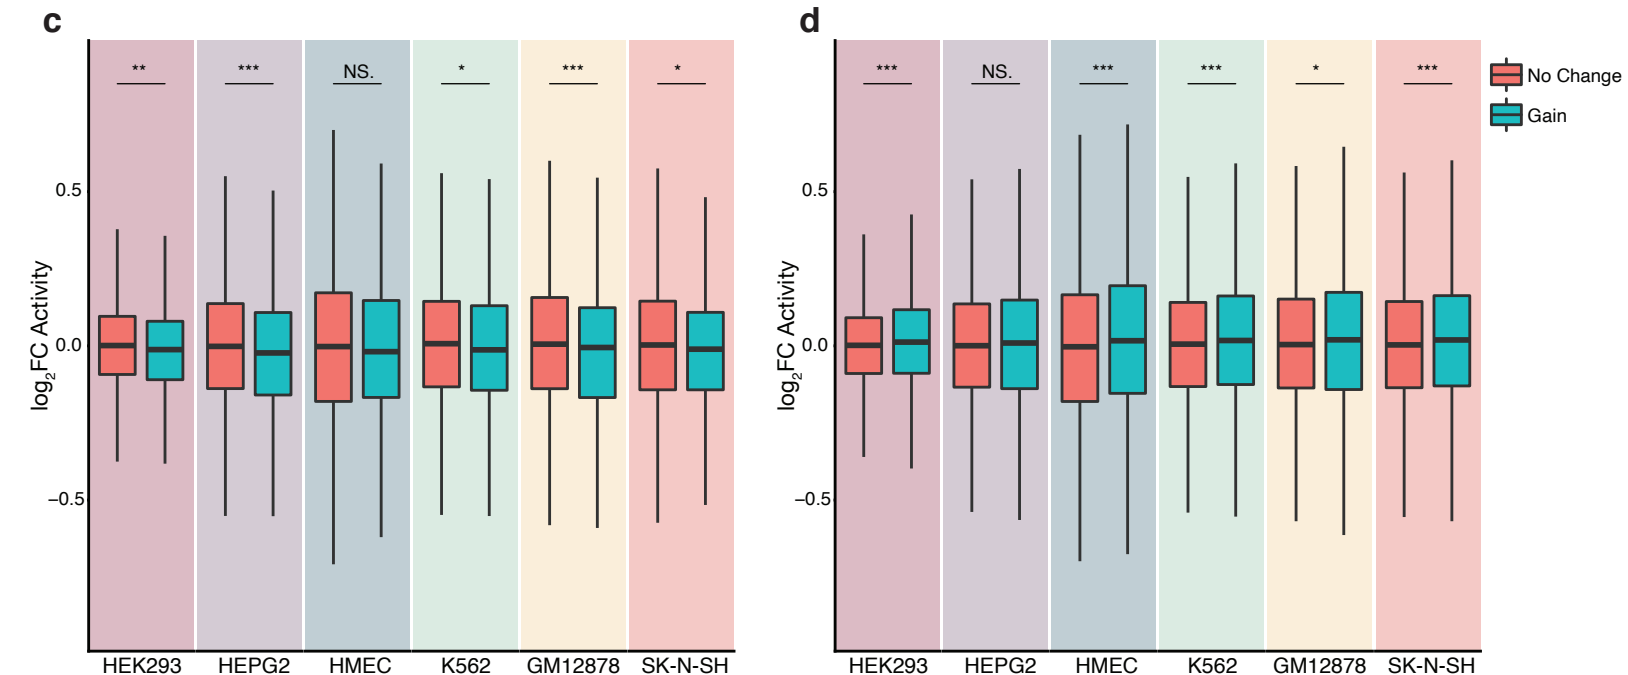

Supplement: NIHMS1739899-supplement-3.pdf [file NIHMS1739899-supplement-3.pdf]

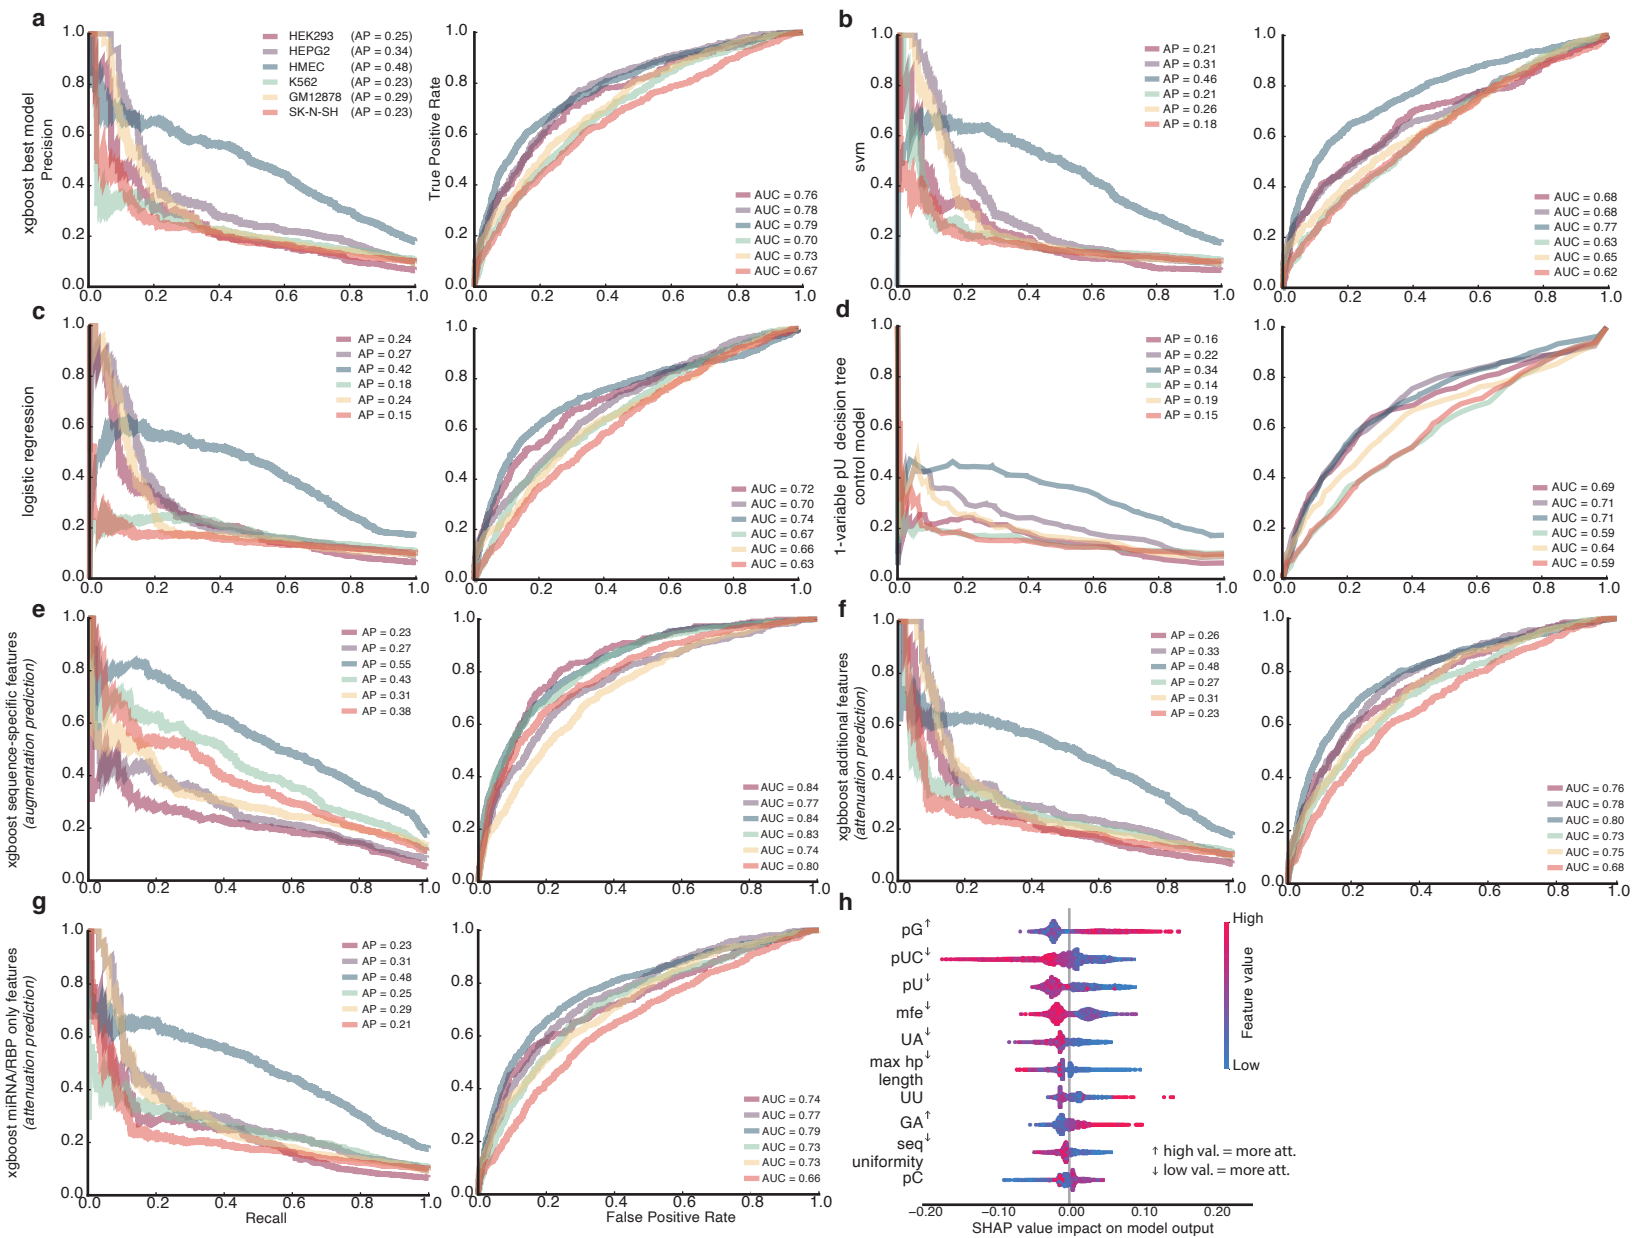

Supplement: NIHMS1739899-supplement-4.pdf [file NIHMS1739899-supplement-4.pdf]

**a**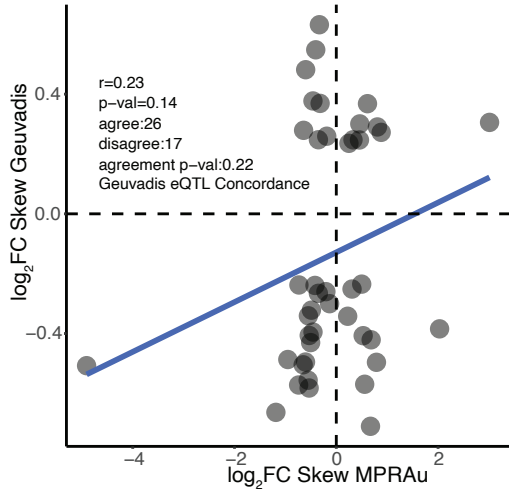**b**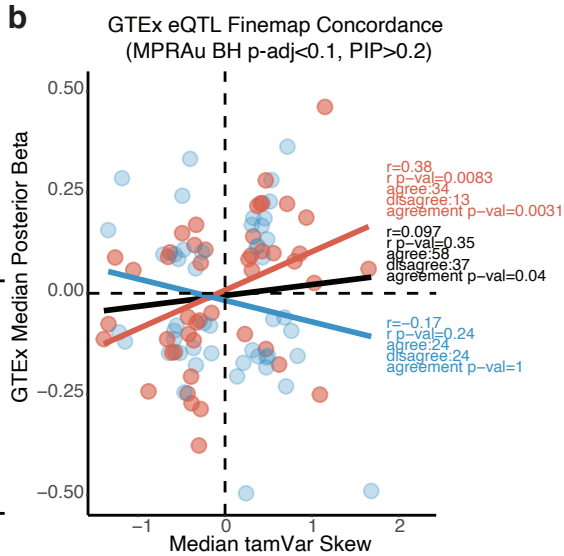**c**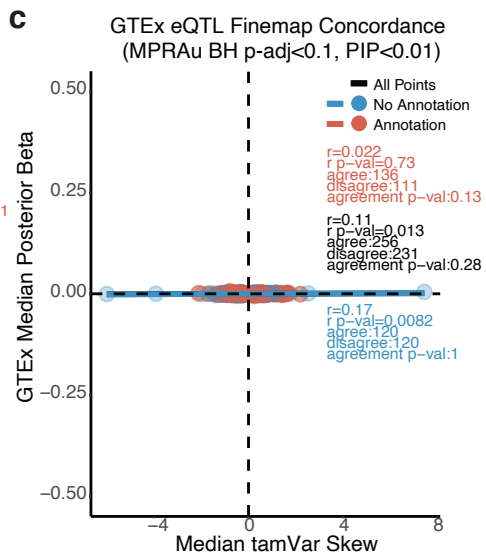

Supplement: NIHMS1739899-supplement-5.pdf [file NIHMS1739899-supplement-5.pdf]

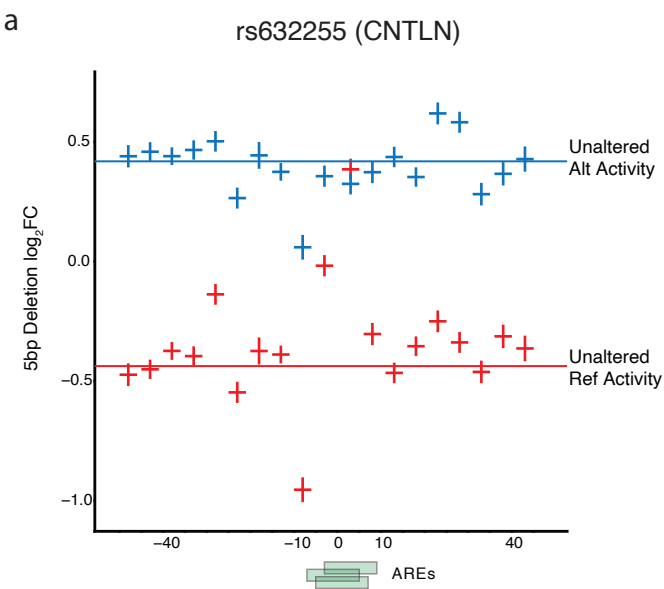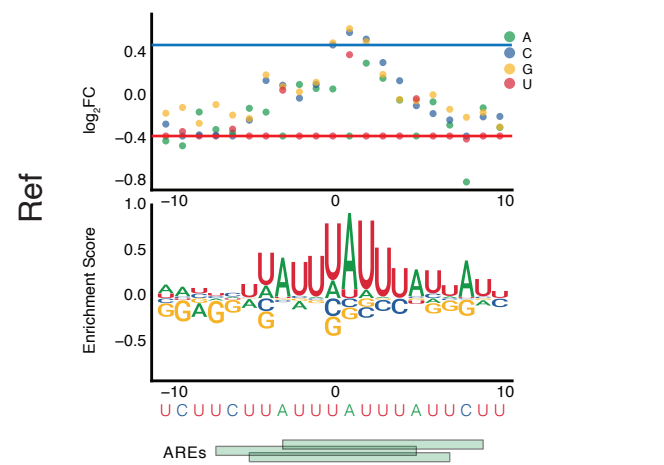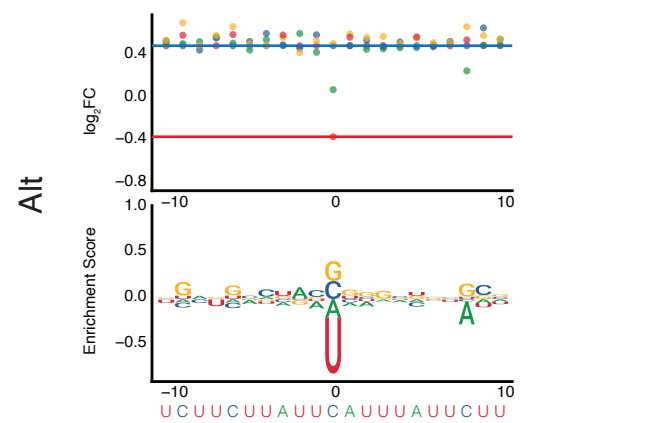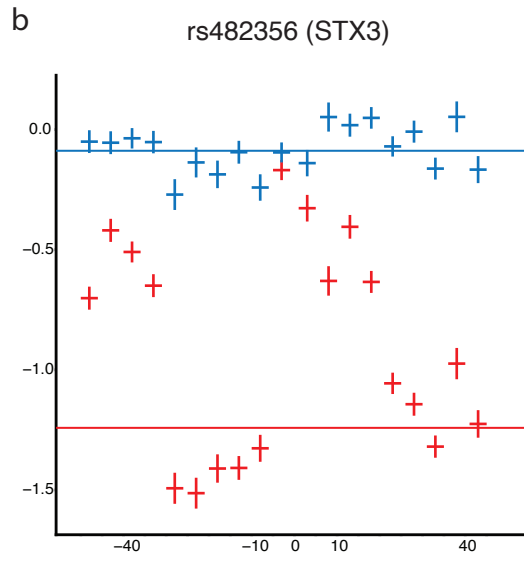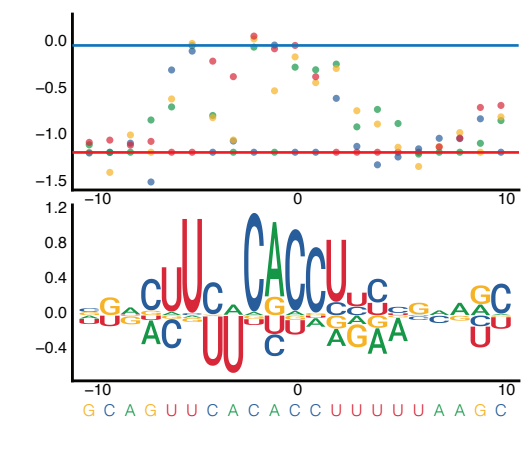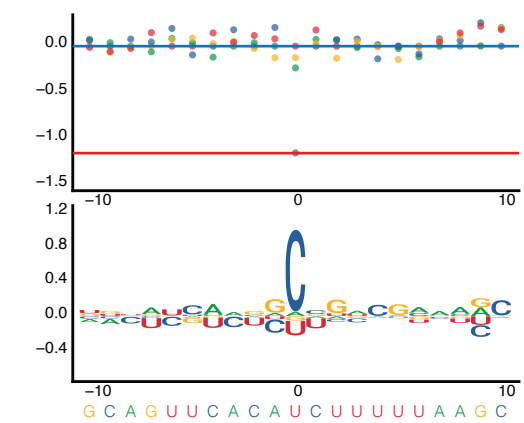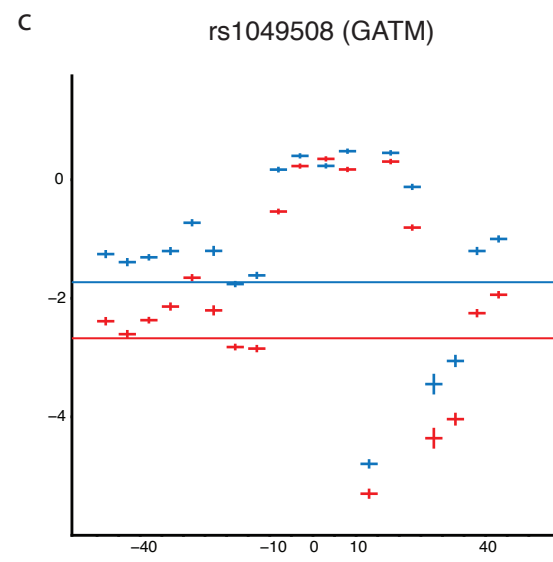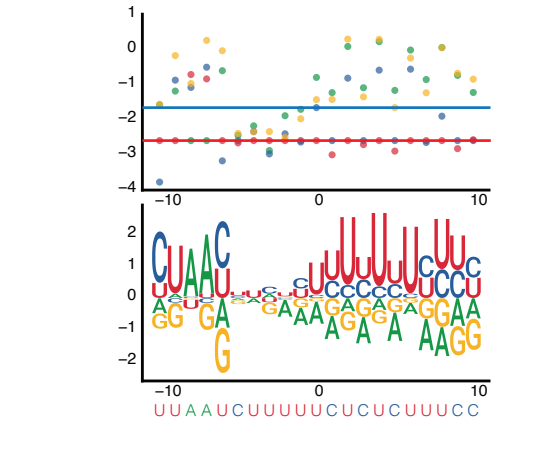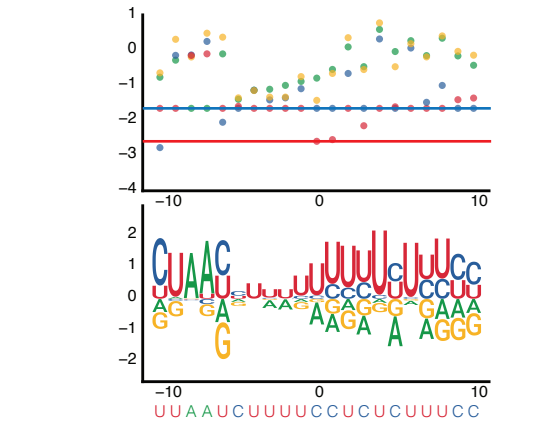

Supplement: NIHMS1739899-supplement-7.pdf [file NIHMS1739899-supplement-7.pdf]
